# Supplementary material for: Genome-wide characterization, evolution, and expression analysis of the leucine-rich repeat receptor-like protein kinase (LRR-RLK) gene family in Rosaceae genomes
Source: PubMed Central journal article supplement (PMC5635495; doi:10.1186/s12864-017-4155-y), 2017-10-10
Supplement: 12864_2017_4155_MOESM2_ESM.pdf [file 12864_2017_4155_MOESM2_ESM.pdf]

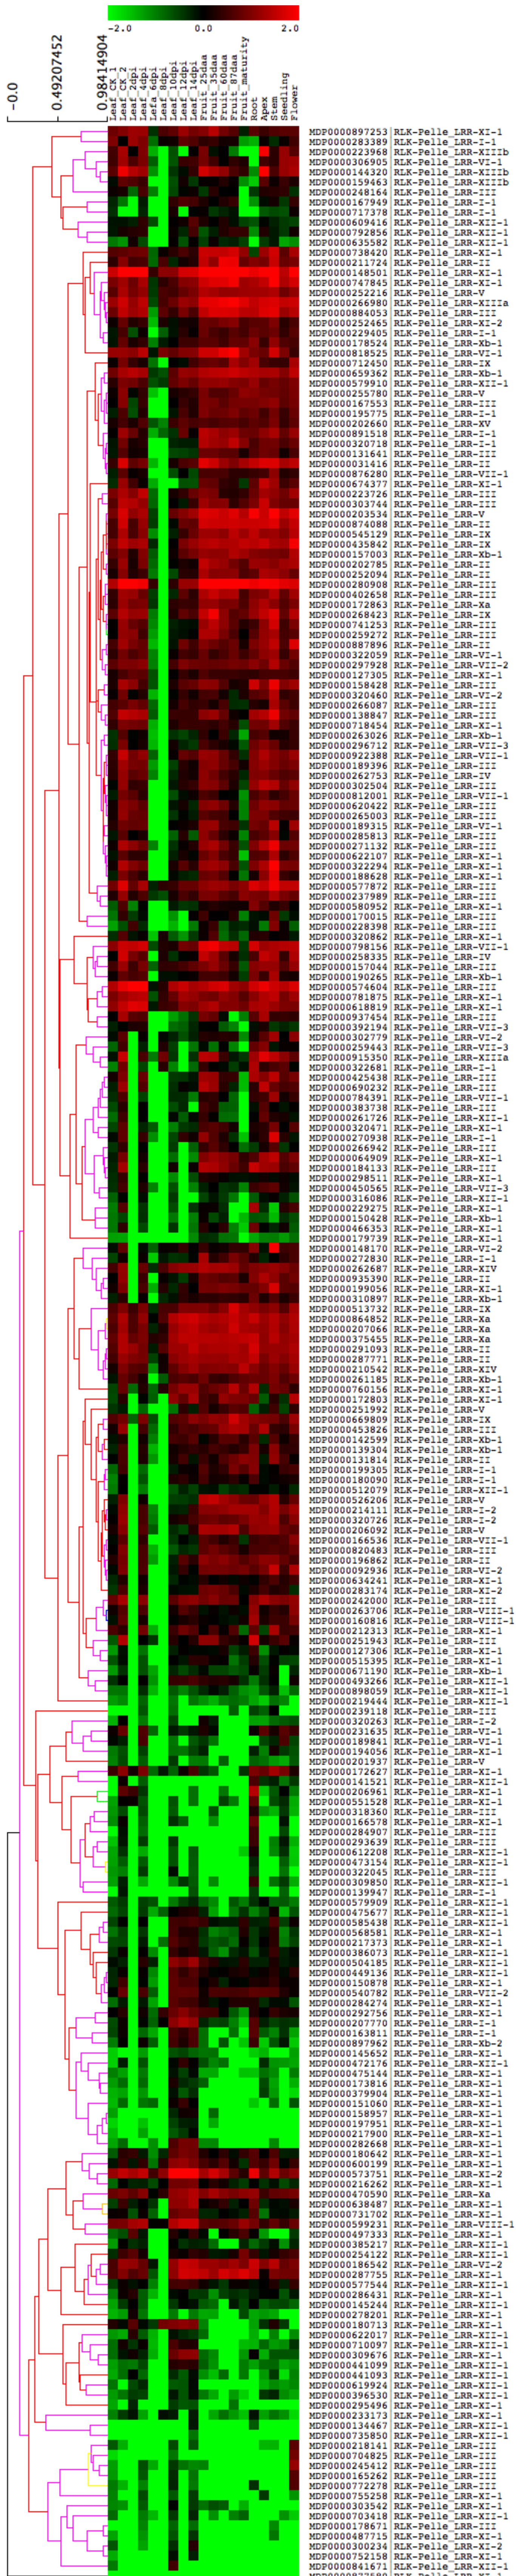

Supplementary Figure 2. Heat map of the expression patterns of 244 apple LRR-RLK genes in different tissues. Red and green colors correspond to up-regulation and down-regulation, respectively. Normalized gene expression values are provided in Supplementary Table 11

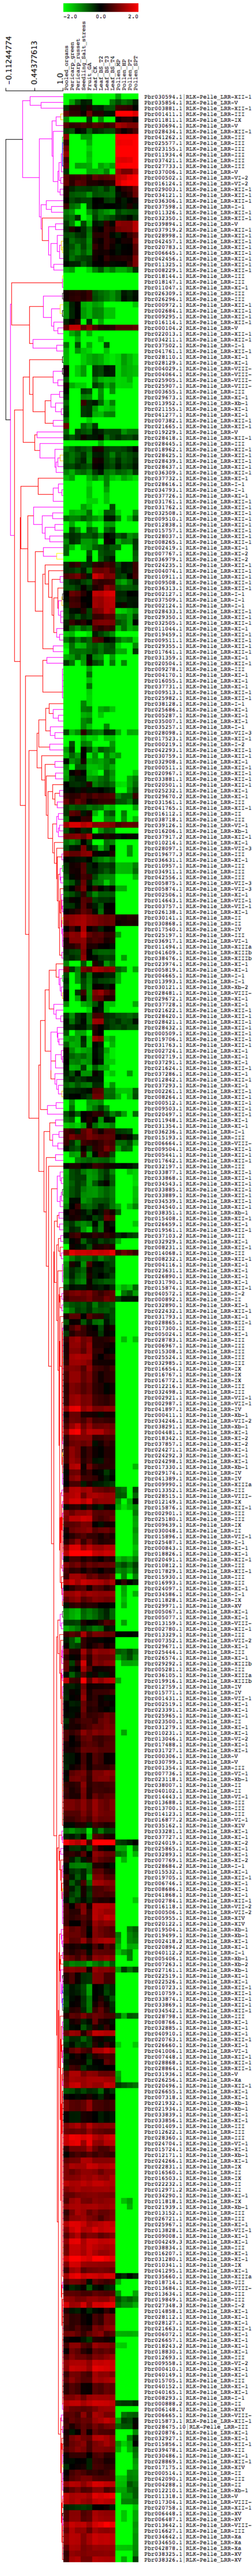

Supplementary Figure 3. Heat map of the expression patterns of 427 Chinese white pear LRR-RLK genes in different tissues. Red and green colors correspond to up-regulation and down-regulation, respectively. Normalized gene expression values are provided in Supplementary Table 2.

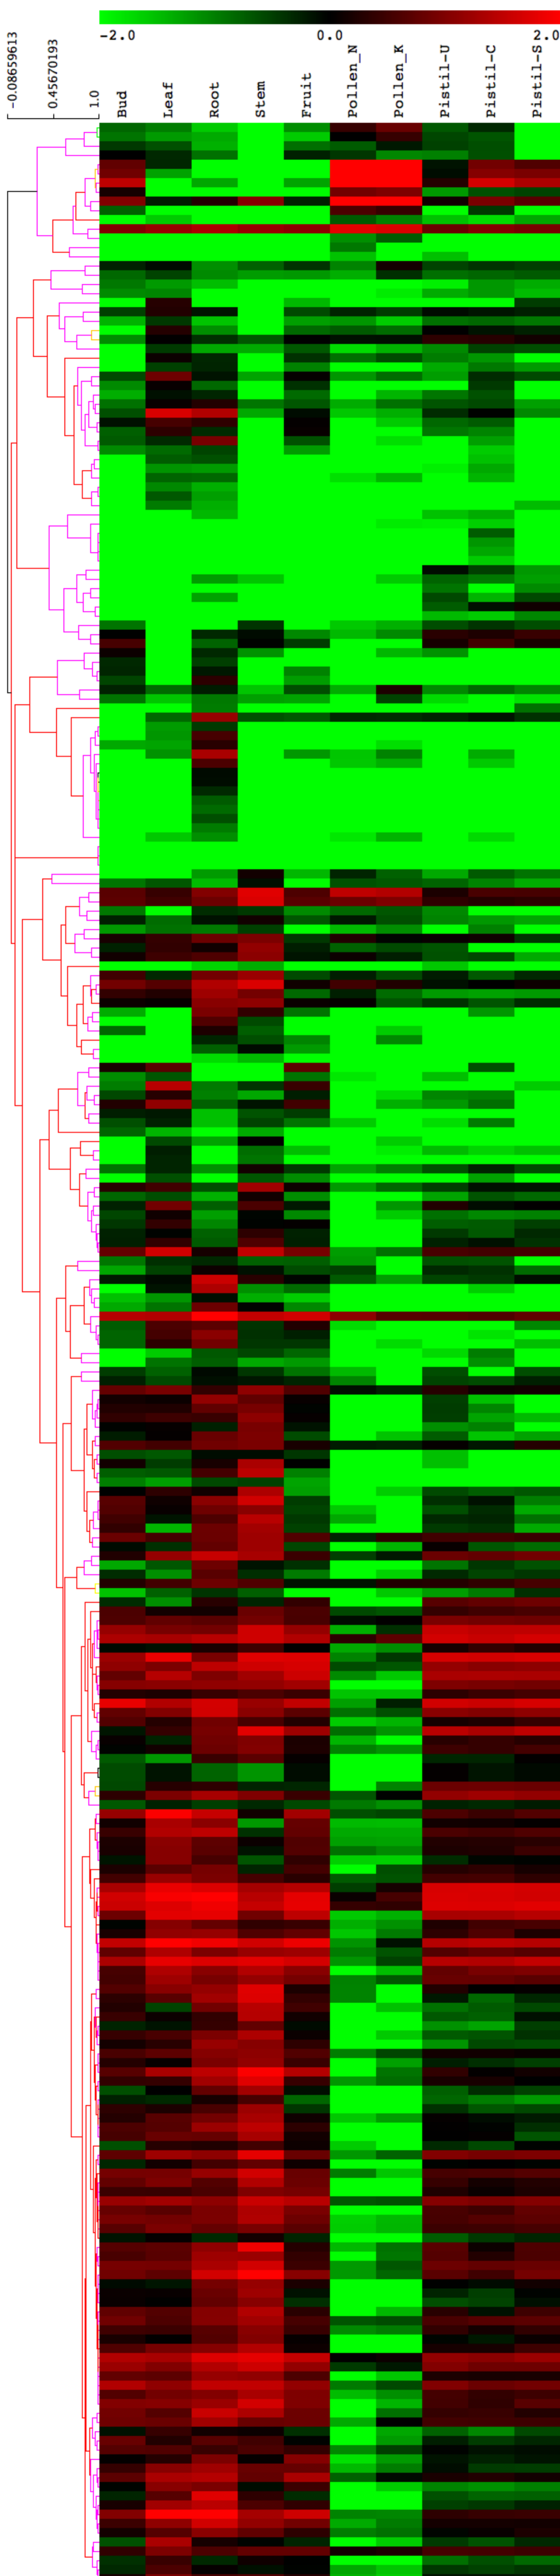

Supplementary Figure 4. Heat map of the expression patterns of 267 mei LRR-RLK genes in different tissues. Red and green colours correspond to up-regulation and down-regulation, respectively. Normalized gene expression values are provided in Supplementary Table 14.

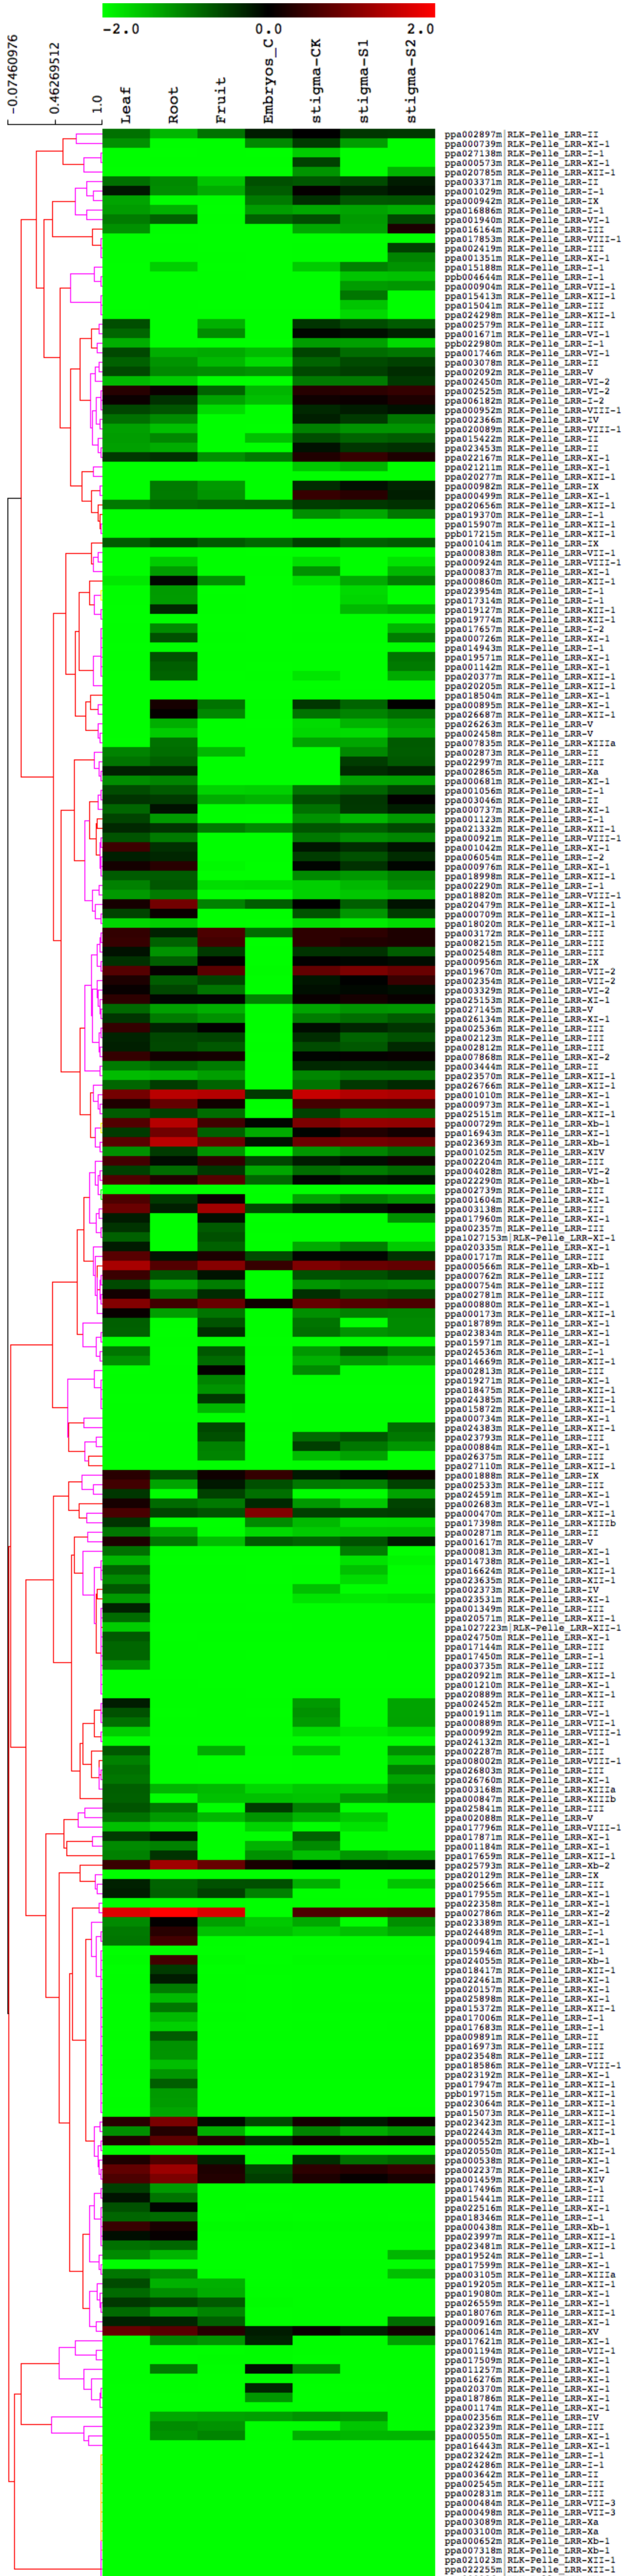

Supplementary Figure 5. Heat map of the expression patterns of 258 peach LRR-RLK genes in different tissues. Red and green colours correspond to up-regulation and down-regulation, respectively. Normalized gene expression values are provided in Supplementary Table 15.

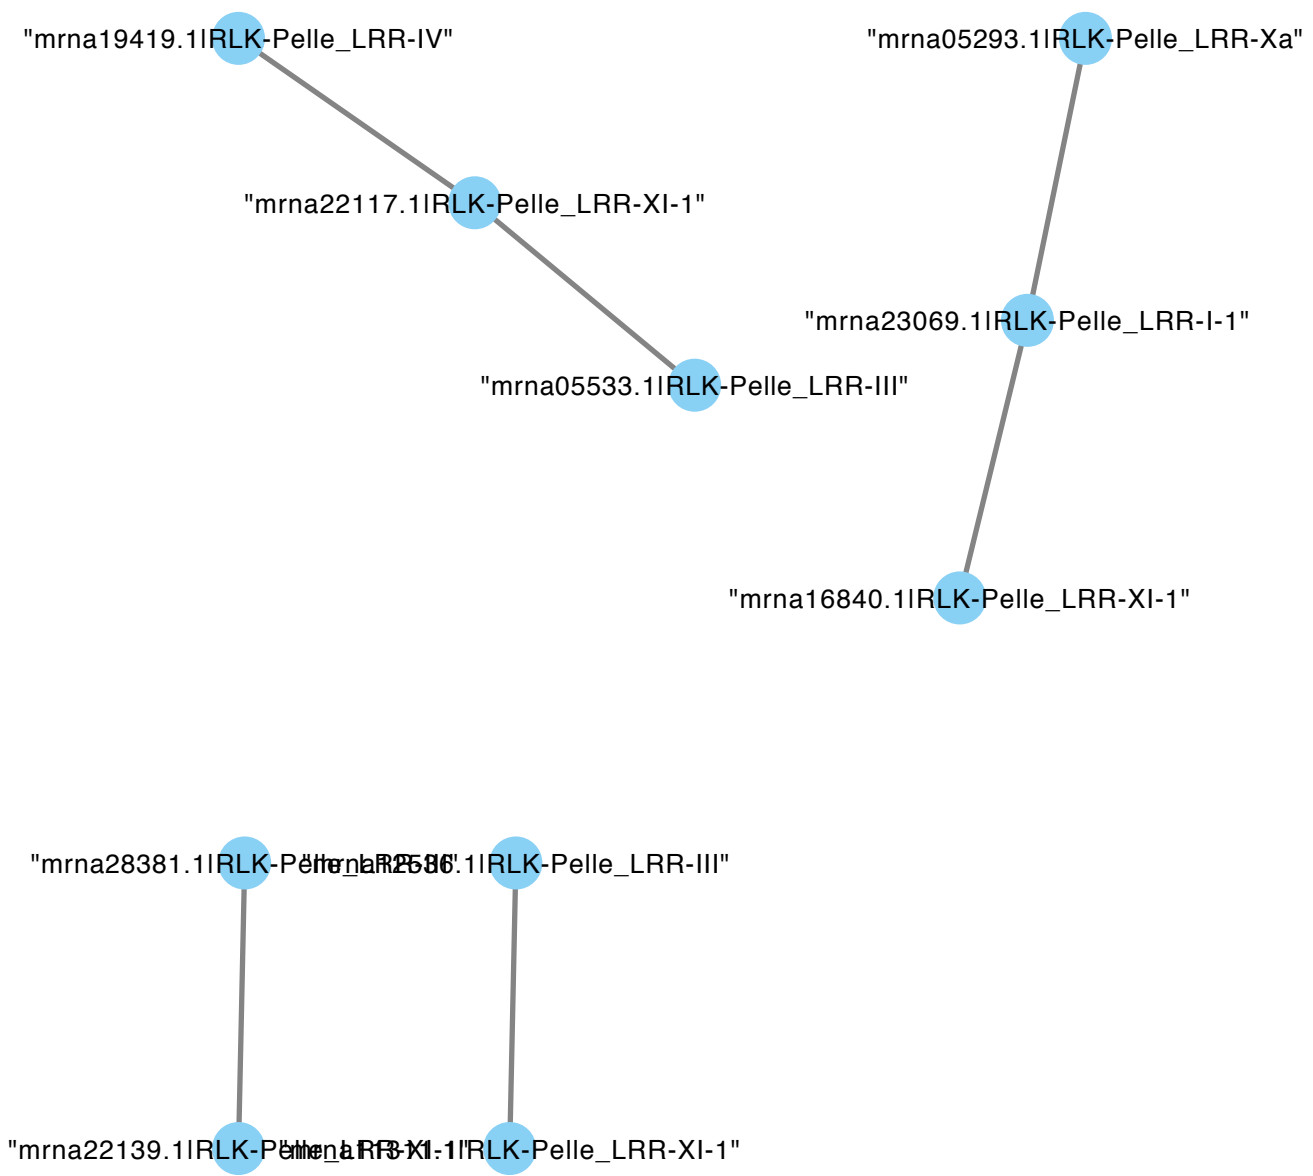

**Supplementary Fig. 6. Co-expression network of strawberry LRR-RLK genes. Nodes indicate genes and edges indicate significant co-expression events between genes.**



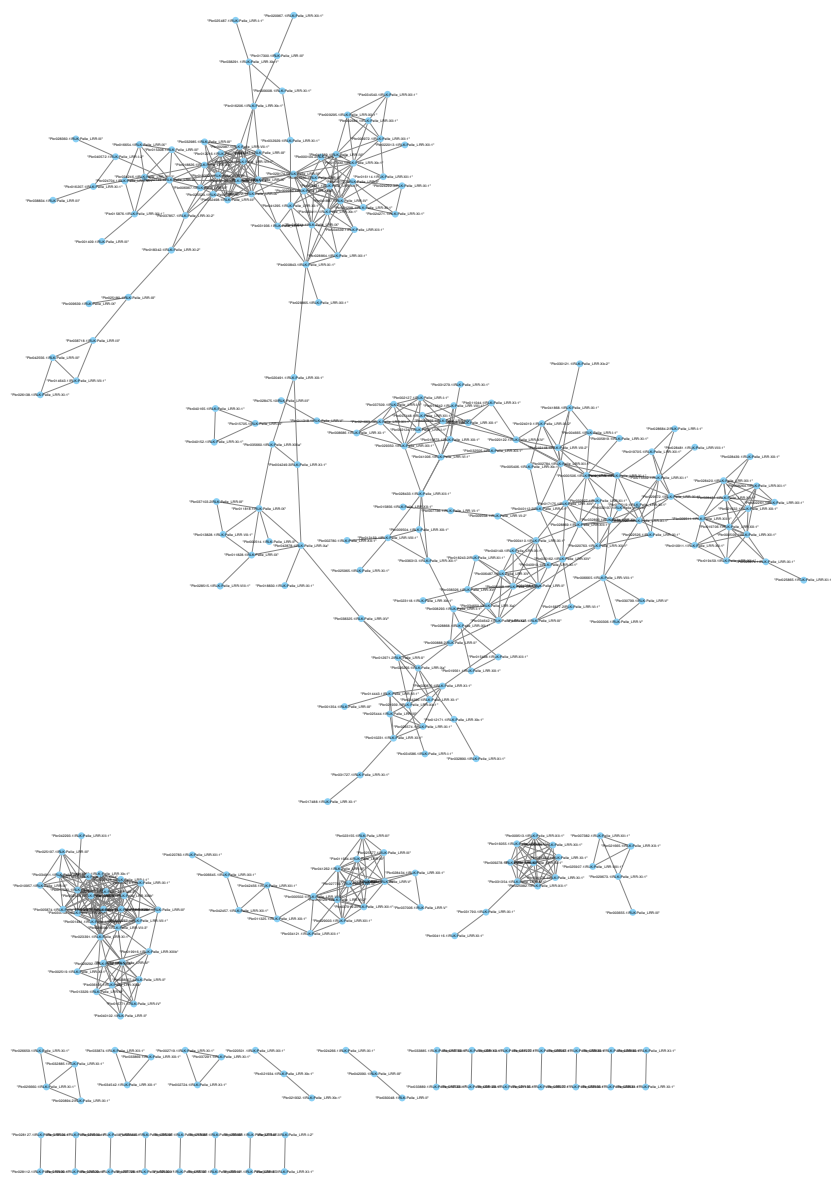

**Supplementary Fig. 8. Co-expression network of Chinese white pear LRR-RLK genes. Nodes indicate genes and edges indicate significant co-expression events between genes.**



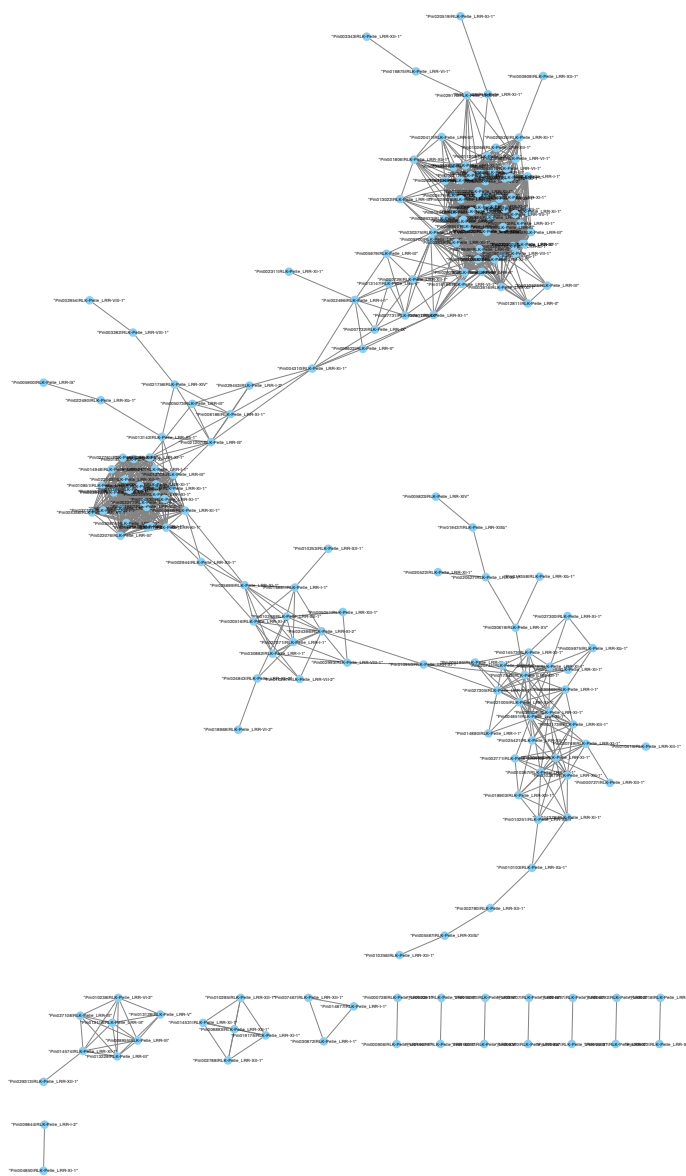

Supplementary Fig. 9. Co-expression network of merL-RR-RLK genes. Nodes indicate genes and edges indicate significant co-expression events between genes.

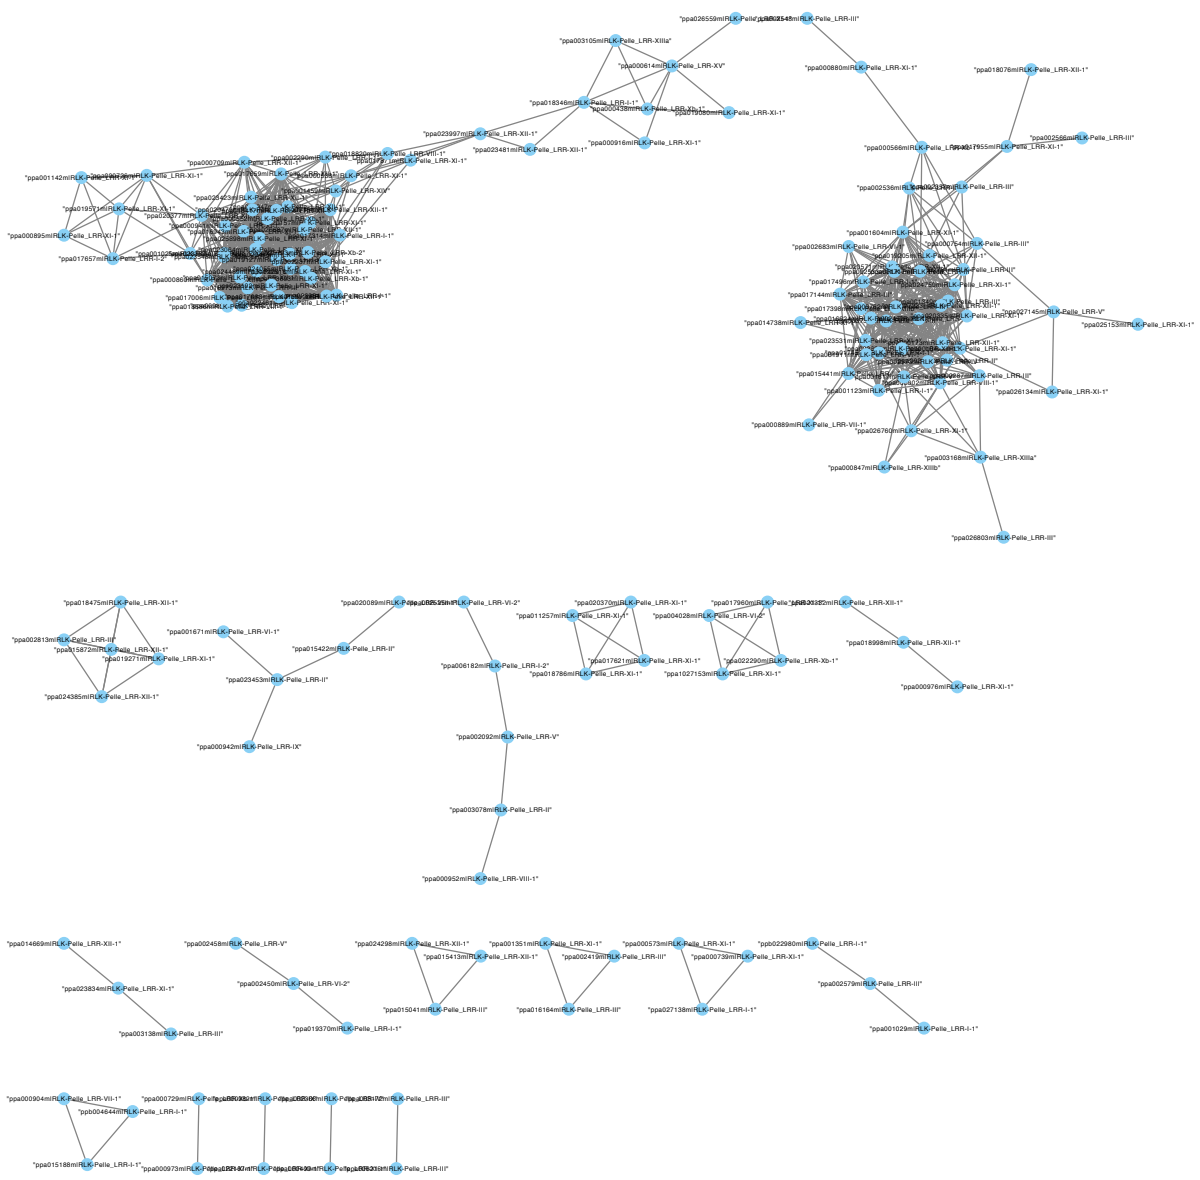

**Supplementary Fig. 10. Co-expression network of peach LRR-RLK genes. Nodes indicate genes and edges indicate significant co-expression events between genes.**
